# Supplementary material
Source: PubMed Central journal article supplement (PMC9108617)
Supplement: EMBJ-41-e108898-s006.pdf [file EMBJ-41-e108898-s006.pdf]

## Expanded View Figures

### Figure EV1. UPF1<sub>LL</sub> has distinct effects on NMD autoregulation and factor requirements.

- A Sashimi plot from representative RNA-seq samples of siNT and siUPF1<sub>LL</sub> knockdown cells. Percent spliced in values and FDR were calculated with rMATS software (Shen *et al*, 2014).
- B Density plot of changes in mRNA stability as determined by REMBRANDTS analysis of RNA-seq following isoform-specific UPF1<sub>LL</sub> depletion (Alkallas *et al*, 2017). mRNAs were binned according to up- or down-regulation in response to siUPF1<sub>LL</sub>. Statistical significance was determined by K–W test, with Dunn's correction for multiple comparisons.
- C RT–qPCR analysis of indicated transcripts following transfection of HEK-293 cells with siRNAs that target both UPF1 isoform (UPF1<sub>total</sub>) and the UPF1<sub>LL</sub> isoform. Relative fold changes are in reference to NT siRNA. siUPF1<sub>total</sub> or siUPF1<sub>LL</sub> was compared to the NT siRNA control for significance testing. Asterisk (\*) indicates  $P < 0.05$ , as determined by two-way ANOVA. Black dots represent individual data points and error bars indicate mean  $\pm$  SD ( $n = 3$  biological replicates). Dashed lines indicate  $\log_2$  (fold change) of  $\pm 0.5$ . See also Dataset EV3 for  $P$ -values associated with each statistical comparison.
- D Venn diagram (to scale) of overlapping targets identified from RNA-seq following UPF1<sub>LL</sub> knockdown (this dataset), total UPF1 knockdown, or SMG6/7 double knockdown and rescue (Colombo *et al*, 2017). Depicted are genes that increased in abundance at least 1.4-fold (FDR  $< 0.05$ ) with UPF1<sub>LL</sub>-specific knockdown and their overlap with genes that increased in abundance (FDR  $< 0.05$ ) with total UPF1 knockdown or genes that increased in abundance with SMG6/7 double knockdown and were significantly rescued by expression of SMG6 or SMG7 (SMG6/7 targets).  $P$ -values indicate enrichment of genes that increased in abundance at least 1.4-fold (FDR  $< 0.05$ ) with UPF1<sub>LL</sub>-specific knockdown among those regulated by total UPF1 and SMG6/7, as determined by Fisher's exact test. Only genes that met read count cutoffs in all conditions were included in the analysis.
- E Density plot of changes in relative mRNA abundance as determined by RNA-seq in SMG7<sup>ko</sup>/SMG5<sup>kd</sup> cells, relative to a parental cell line treated with control siRNAs (Boehm *et al*, 2021). Genes were categorized as up-regulated by siUPF1<sub>total</sub> only, siUPF1<sub>LL</sub> only, or both siUPF1<sub>total</sub> and siUPF1<sub>LL</sub>. Statistical significance was determined by K–W test, with Dunn's correction for multiple comparisons.
- F Density plot of changes in relative mRNA abundance as determined by RNA-seq following UPF1<sub>LL</sub> knockdown in HEK-293 cells. Genes were categorized as up-regulated by SMG7<sup>ko</sup>, SMG7<sup>ko</sup>/SMG5<sup>kd</sup>, SMG7<sup>ko</sup>/SMG6<sup>kd</sup>, or SMG7<sup>ko</sup>/SMG5<sup>kd</sup> and SMG7<sup>ko</sup>/SMG6<sup>kd</sup> (Boehm *et al*, 2021). Statistical significance was determined by K–W test, with Dunn's correction for multiple comparisons.
- G Box plot of  $\log_2$  enrichment for translation at the ER (Jan *et al*, 2014). mRNAs were binned by sensitivity to UPF1<sub>LL</sub>-specific knockdown in HEK-293 cells. Statistical significance was determined by K–S test (\*\*\*\* $P = 1 \times 10^{-6}$ ). Boxes indicate interquartile ranges, horizontal lines represent medians, and bars indicate Tukey whiskers.

Source data are available online for this figure.

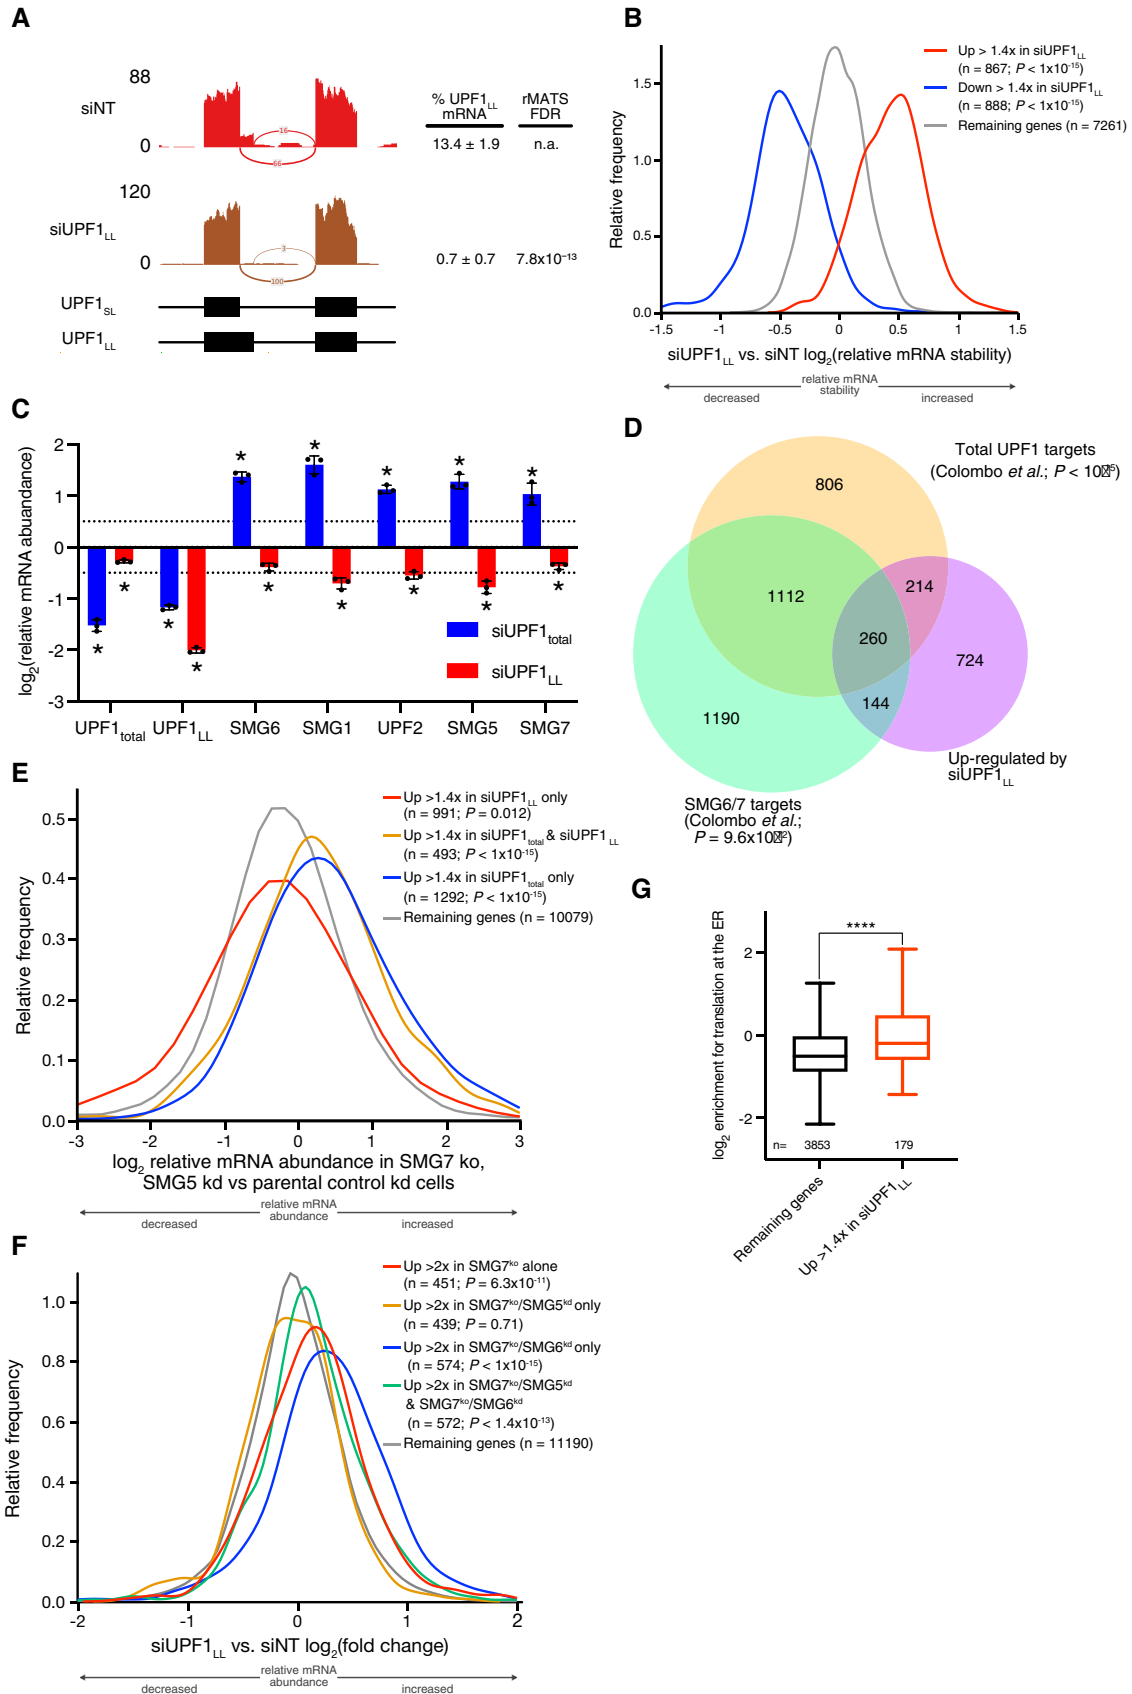

Figure EV1.

**Figure EV2. NMD protection can be overcome by UPF1<sub>LL</sub>.**

- A Western blots of CLIP-UPF1<sub>SL</sub> and CLIP-UPF1<sub>LL</sub> overexpression. Membranes were probed with an anti-UPF1 antibody that detects both endogenous and CLIP-tagged UPF1. Wedge indicates serial twofold dilutions of lysate. Mean ( $\pm$  SD) of CLIP-UPF1 overexpression was determined from two replicate membranes.
- B RT-qPCR analysis of well-characterized NMD targets following total UPF1 knockdown and rescue with siRNA-resistant CLIP-tagged UPF1. Relative fold changes are in reference to the GFP-expressing control line treated with a NT siRNA. Significance of NMD rescue by CLIP-UPF1 was compared to the GFP-expressing control line treated with total UPF1 siRNA. Asterisk (\*) indicates  $P < 0.0001$ , as determined by two-way ANOVA with multiple comparisons. Black dots represent individual data points and error bars indicate mean  $\pm$  SD ( $n = 3$  biological replicates). PTC+ indicates the use of primers specific to transcript isoforms with validated poison exons (Lareau *et al*, 2007; Ni *et al*, 2007). See also Dataset EV3 for  $P$ -values associated with each statistical comparison.
- C Density plot of recovered mRNAs in CLIP-UPF1<sub>LL</sub> affinity purifications relative to that of CLIP-UPF1<sub>SL</sub>. Genes were categorized as up-regulated by siUPF1<sub>total</sub> only, siUPF1<sub>LL</sub> only, or both siUPF1<sub>total</sub> and siUPF1<sub>LL</sub>. Statistical significance was determined by K-W test, with Dunn's correction for multiple comparisons.
- D RT-qPCR analysis of indicated transcripts from UPF1 RIP-seq experiments. Relative fold enrichment was determined by dividing the recovered mRNA by its corresponding input amount. Significance of differential recovery in CLIP-UPF1<sub>LL</sub> RIP was determined by comparison to that in CLIP-UPF1<sub>SL</sub>. Asterisk (\*) indicates  $P < 0.05$ , as determined by unpaired Student's  $t$ -test. Black dots represent individual data points, and error bars indicate mean  $\pm$  SD ( $n = 3$  biological replicates). For protected mRNAs, the PTBP1/hnRNP L motif density bin of the 3'UTR is indicated. PTC<sup>+</sup> indicates the use of primers specific to transcript isoforms with validated poison exons (Lareau *et al*, 2007; Ni *et al*, 2007). See also Dataset EV3 for  $P$ -values associated with each statistical comparison.
- E Density plots of changes in relative mRNA abundance as determined by RNA-seq following UPF1<sub>LL</sub> (top) or UPF1<sub>SL</sub> (bottom) overexpression. mRNAs were binned according to enrichment in the CLIP-UPF1<sub>LL</sub> or CLIP-UPF1<sub>SL</sub> affinity purifications. Statistical significance was determined by K-W test, with Dunn's correction for multiple comparisons.
- F Density plots of changes in mRNA stability as determined by REMBRANDTS analysis of RNA-seq following UPF1<sub>LL</sub> (top) or UPF1<sub>SL</sub> (bottom) overexpression. mRNAs were binned according to enrichment in the CLIP-UPF1<sub>LL</sub> or CLIP-UPF1<sub>SL</sub> affinity purifications. Statistical significance was determined by K-W test, with Dunn's correction for multiple comparisons.

Source data are available online for this figure.

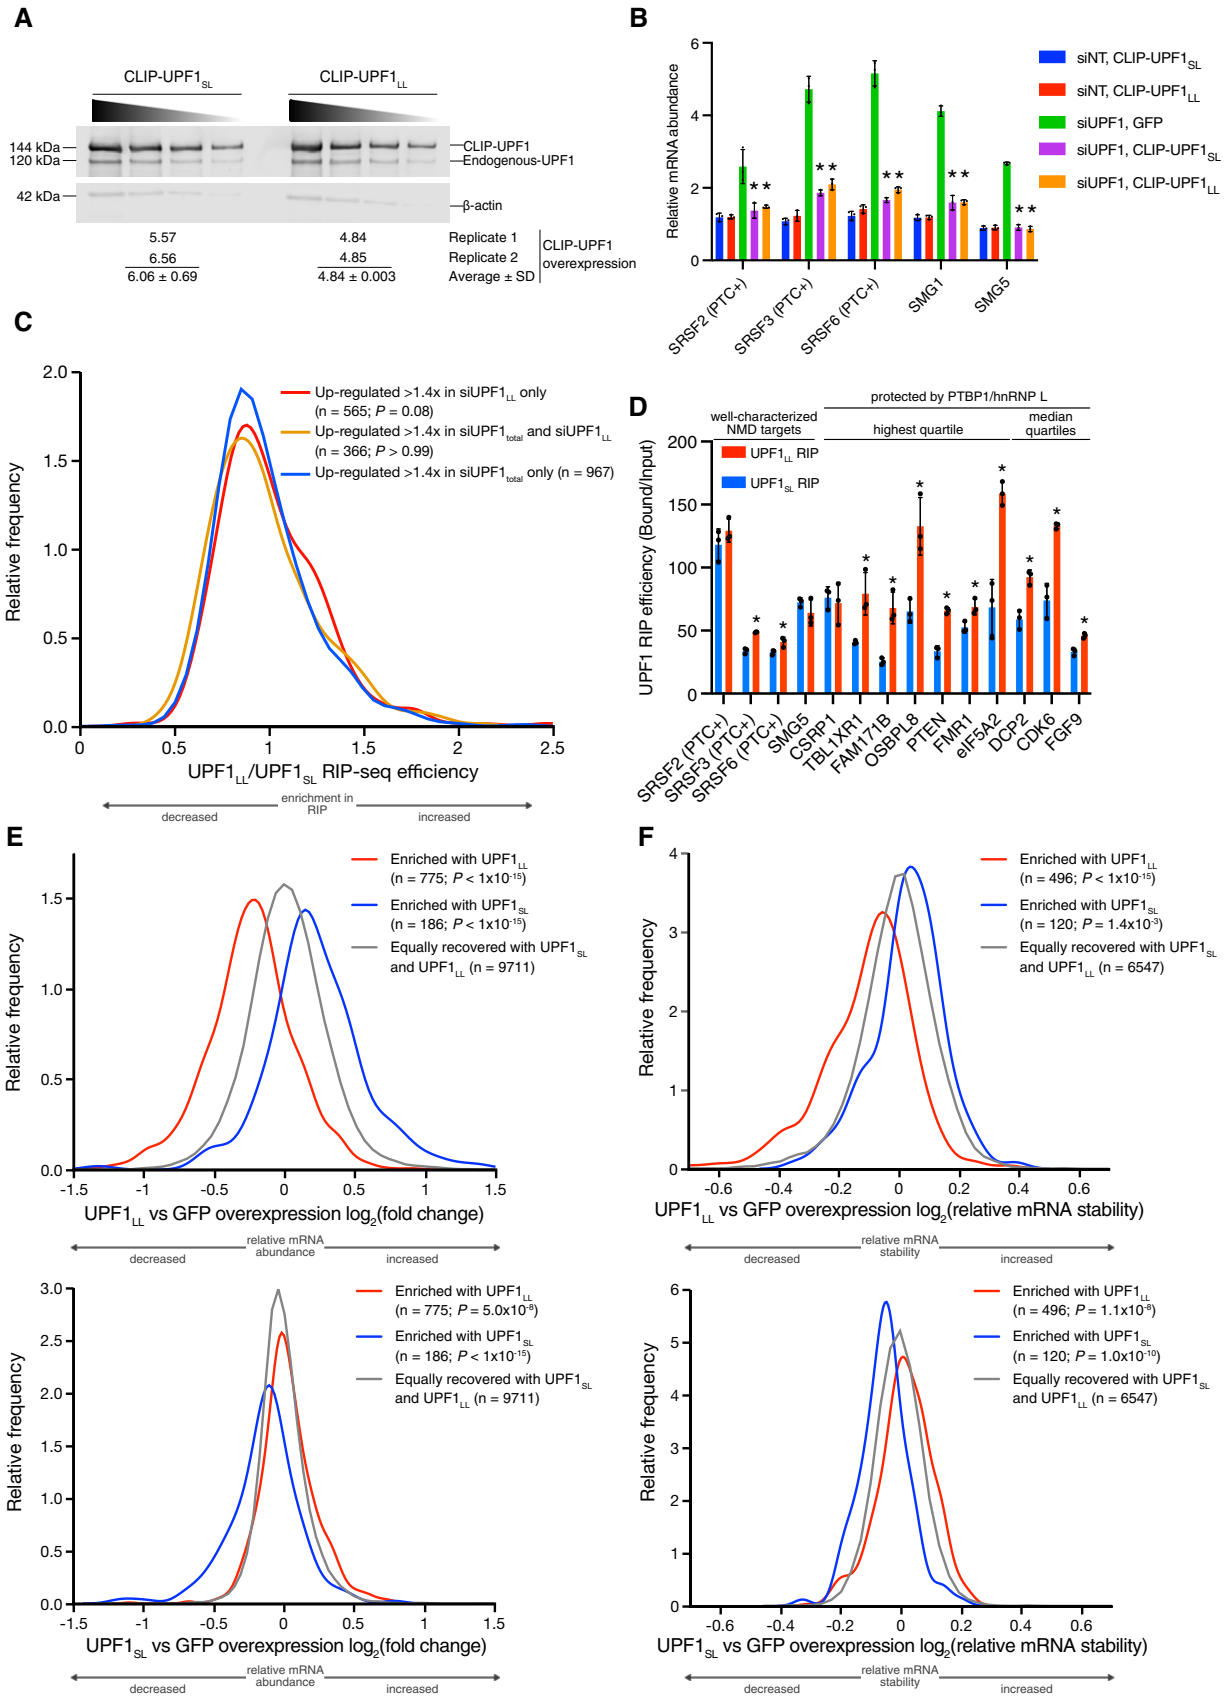

Figure EV2.

**Figure EV3. Transcripts targeted by UPF1<sub>LL</sub> are coordinately down-regulated during ER stress and induction of the ISR.**

- A Volcano plot of relative mRNA abundance as determined from RNA-seq following treatment of HEK-293 cells with 1  $\mu$ M tunicamycin for 6 h (Data ref: Park *et al*, 2017). mRNAs were binned by RIP-seq efficiency in CLIP-UPF1<sub>LL</sub> or CLIP-UPF1<sub>SL</sub> affinity purifications. Statistical significance was determined by K–W test, with Dunn's correction for multiple comparisons. Dashed line indicates the significance threshold  $P \leq 0.05$  ( $n = 3$  biological replicates).
- B Western blot of eIF2 $\alpha$  phosphorylation following treatment of HEK-293 cells with 1  $\mu$ M thapsigargin for 6 h.
- C Schematic of the RNA-seq experimental workflow and conditions for UPF1<sub>LL</sub> knockdown and thapsigargin treatment.
- D Density plot of relative mRNA stability as determined by REMBRANDTS analysis of RNA-seq following treatment of HEK-293 cells with 1  $\mu$ M thapsigargin for 6 h. mRNAs were binned by changes in relative mRNA abundance in thapsigargin. Statistical significance was determined by K–S test.
- E Density plot of relative mRNA stability as determined by REMBRANDTS analysis of RNA-seq following UPF1<sub>LL</sub> knockdown in HEK-293 cells and treatment with 1  $\mu$ M thapsigargin for 6 h (Alkallas *et al*, 2017). mRNAs were binned by changes in relative mRNA abundance in thapsigargin with UPF1<sub>LL</sub> knockdown. Statistical significance was determined by K–W test, with Dunn's correction for multiple comparisons.
- F Quantification of characterized ISR-target transcript abundance in RNA-seq of the indicated conditions. Error bars indicate mean  $\pm$  SD ( $n = 3$  biological replicates).
- G Quantification of UPF1<sub>LL</sub> isoform expression in control and thapsigargin-treated HEK-293 cells from rMATS analyses ( $n = 3$  biological replicates).

Source data are available online for this figure.

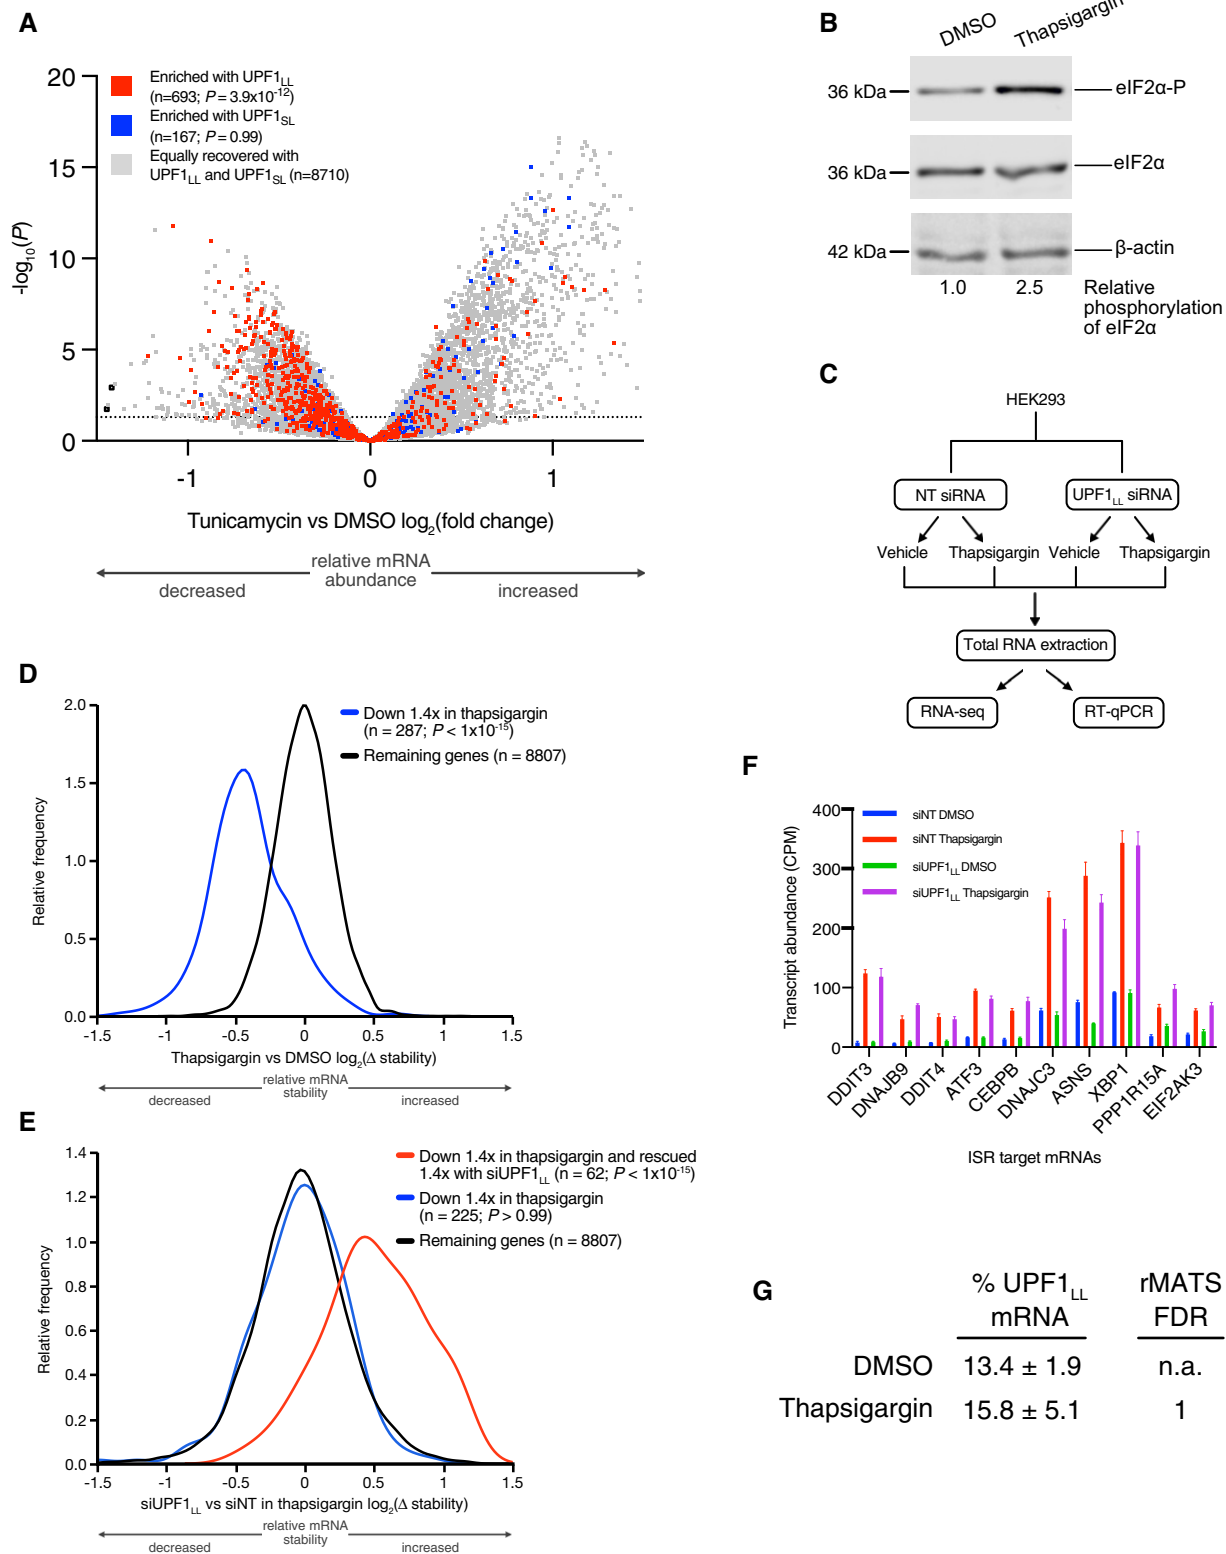

Figure EV3.

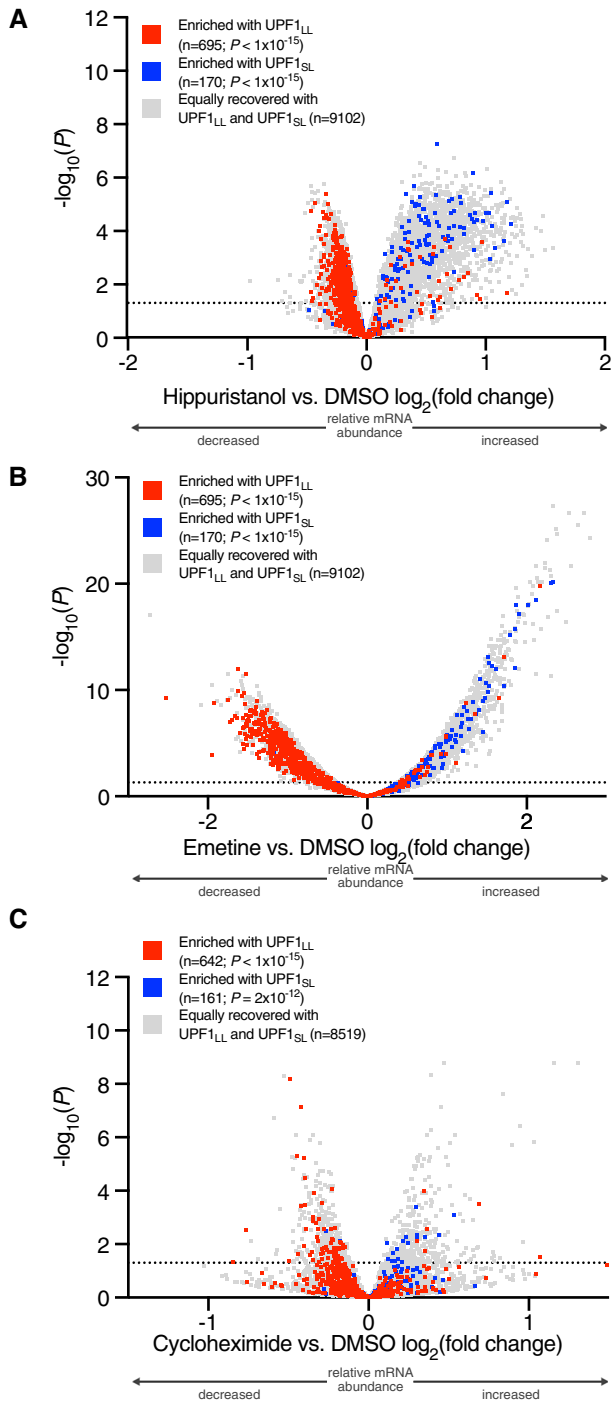

**Figure EV4. UPF1<sub>LL</sub> targets decrease in abundance with translational inhibition.**

- A** Volcano plot of relative mRNA abundance as determined from RNA-seq following treatment of MCF7 cells with 150 nM hippuristanol for 1 h (Data ref: Waldron *et al*, 2019). mRNAs were binned by RIP-seq efficiency in CLIP-UPF1<sub>LL</sub> or CLIP-UPF1<sub>SL</sub> affinity purifications. Statistical significance was determined by K-W test, with Dunn's correction for multiple comparisons. Dashed line indicates the significance threshold  $P \leq 0.05$  ( $n = 3$  biological replicates).
- B** Volcano plot as in (A), following treatment of HEK-293 cells with 50 ng/ml emetine for 4 h (Martinez-Nunez *et al*, 2017). Dashed line indicates the significance threshold  $P \leq 0.05$  ( $n = 3$  biological replicates).
- C** Volcano plot as in (A), following treatment of HeLa cells with 100  $\mu$ g/ml cycloheximide for 15 min (Data ref: Kearsse *et al*, 2019). Dashed line indicates the significance threshold  $P \leq 0.05$  ( $n = 3$  biological replicates).

**Figure EV5. Reduced translation efficiency promotes UPF1<sub>LL</sub> activity.**

- A Schematic of the RNA-seq experimental workflow and conditions for UPF1<sub>LL</sub> knockdown and puromycin treatment.
- B Density plot of relative mRNA abundance as determined by RNA-seq following treatment of HEK-293 cells with 50 µg/ml puromycin. mRNAs were binned according to destabilization in CLIP-UPF1<sub>LL</sub> or CLIP-UPF1<sub>SL</sub> overexpression experiments, as determined by REMBRANDTS analysis (Alkallas et al, 2017). Statistical significance was determined by K-S test.
- C Quantification of UPF1<sub>LL</sub> isoform expression in control and puromycin-treated HEK-293 cells from rMATS analyses ( $n = 3$  biological replicates) (Shen et al, 2014).
- D RT-qPCR analysis of indicated transcripts following treatment of HEK-293 cells with indicated concentrations of puromycin for 4 h. Relative fold changes are in reference to vehicle-treated control. Significance of puromycin treatment on relative transcript abundance was compared to the vehicle-treated control. Asterisk (\*) indicates  $P < 0.05$ , as determined by two-way ANOVA. Black dots represent individual data points, and error bars indicate mean  $\pm$  SD ( $n = 3$  biological replicates). Dashed lines indicate  $\log_2$  (fold change) of  $\pm 0.5$ . PTC<sup>+</sup> indicates the use of primers specific to the transcript isoform with a validated poison exon (Lareau et al, 2007; Ni et al, 2007). See also Dataset EV3 for  $P$ -values associated with each statistical comparison.
- E Density plot of relative mRNA abundance as determined by RNA-seq following treatment of HEK-293 cells with 25 µg/ml or 100 µg/ml puromycin. mRNAs were binned according to sensitivity to 50 µg/ml puromycin and UPF1<sub>LL</sub> knockdown. Statistical significance was determined by K-S test.
- F Density plot of relative mRNA stability as determined by REMBRANDTS analysis of RNA-seq following treatment of HEK-293 cells with 50 µg/ml puromycin for 4 h (Alkallas et al, 2017). mRNAs were binned by changes in relative mRNA abundance in puromycin. Statistical significance was determined by K-S test.
- G Density plot of relative mRNA stability as determined by REMBRANDTS analysis of RNA-seq following UPF1<sub>LL</sub> knockdown in HEK-293 cells and treatment with 50 µg/ml puromycin for 4 h (Alkallas et al, 2017). mRNAs were binned by changes in relative mRNA abundance in puromycin with UPF1<sub>LL</sub> knockdown. Statistical significance was determined by K-W test, with Dunn's correction for multiple comparisons.

Source data are available online for this figure.



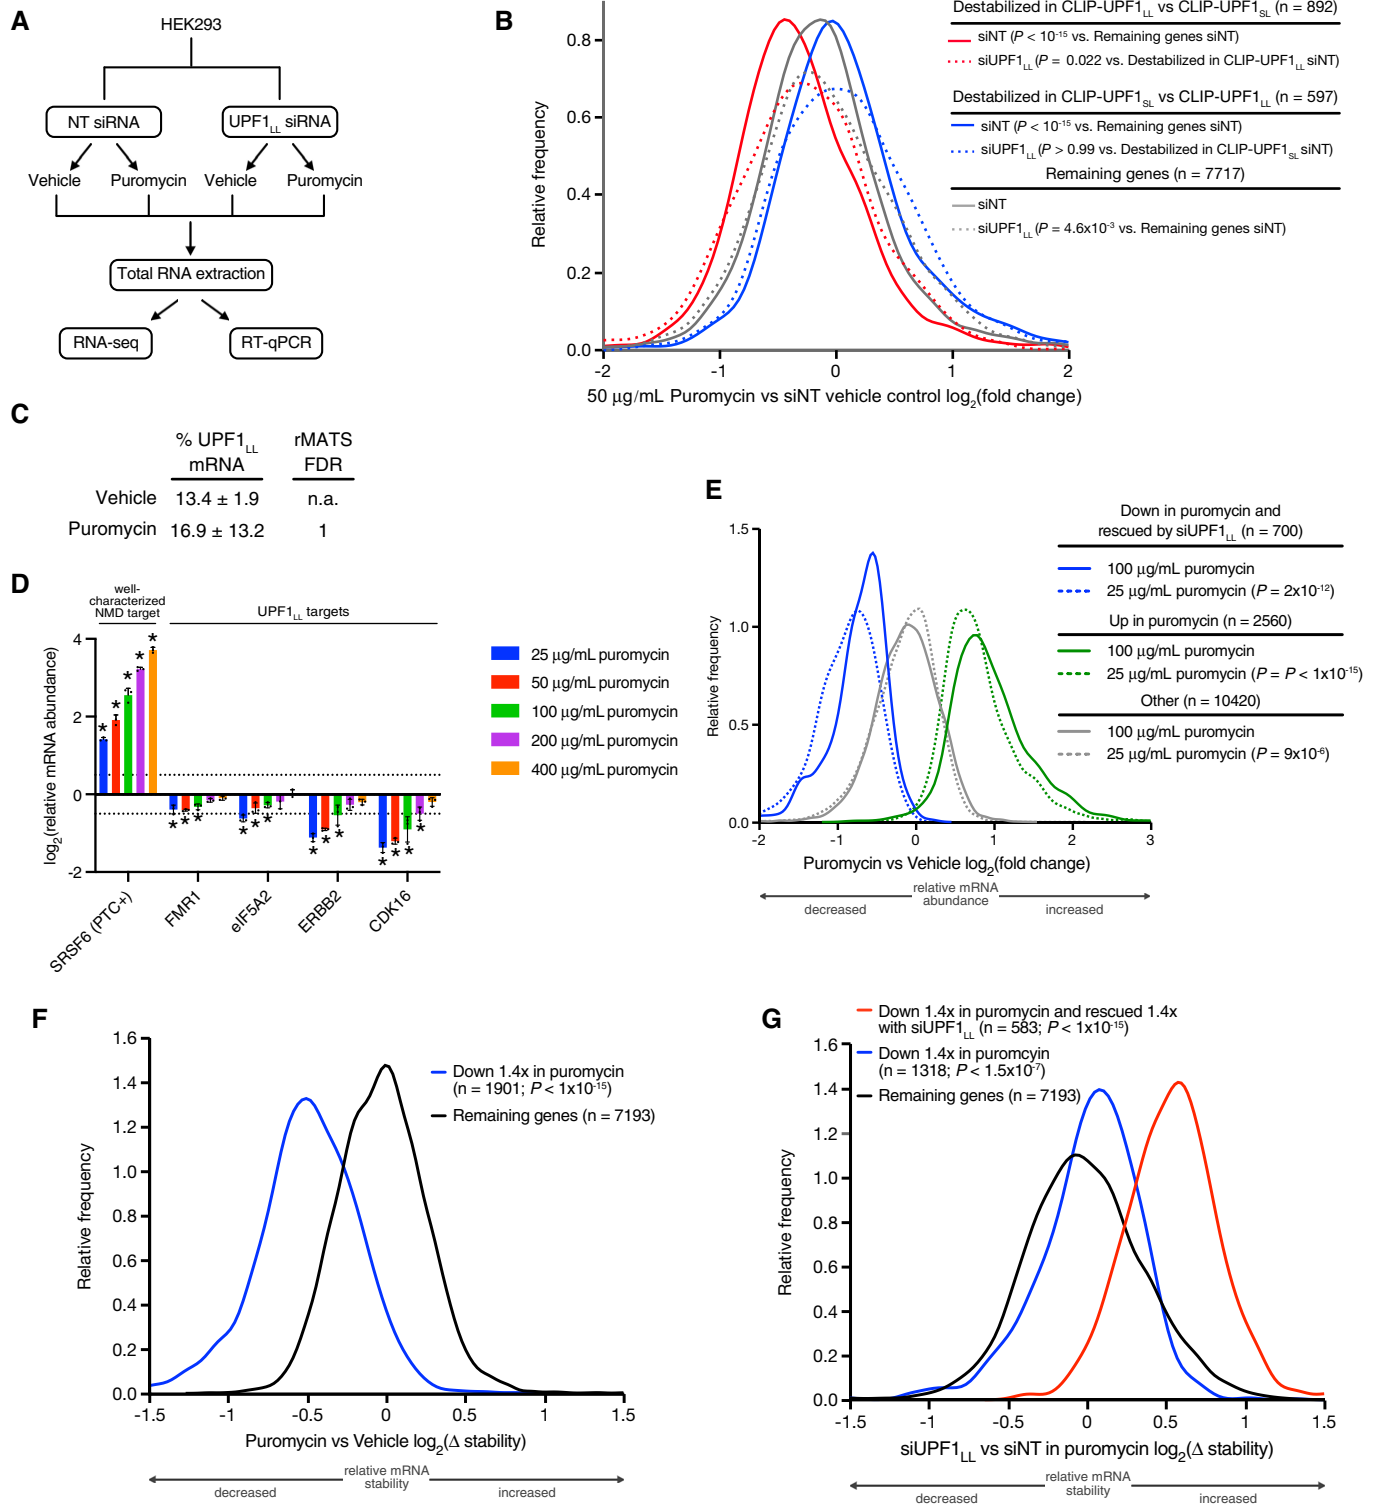

Figure EV5.
