# Supplementary material
Source: PubMed Central journal article supplement (PMC9108617)
Supplement: EMBJ-41-e108898-s015.pdf [file EMBJ-41-e108898-s015.pdf]

## Appendix

### Table of Contents

**Appendix Figure S1. Conserved UPF1<sub>LL</sub> does not systematically regulate EJC-enhanced NMD, page 2.**

**Appendix Figure S2. UPF1<sub>LL</sub> can bind transcripts normally shielded by protective proteins, page 3.**

**Appendix Figure S3. UPF1<sub>LL</sub> overexpression down-regulates NMD-protected mRNAs in a dose-dependent manner, page 4.**

**Appendix Figure S4. UPF1<sub>LL</sub> expression is regulated by SRSF1, page 5.**

**Appendix Figure S5. Reduced sensitivity of UPF1<sub>LL</sub> to translocation inhibition by PTBP1, page 6.**

**Appendix Figure S6. mRNAs selectively down-regulated during ER stress and induction of the ISR are systematically dependent upon UPF1<sub>LL</sub> for their regulation, page 7.**

**Appendix Figure S7. Downregulation of select genes during partial translational repression is dependent upon UPF1<sub>LL</sub> activity, page 8.**

**Appendix Table S1. NMD-inducing features of genes common and unique to UPF1<sub>total</sub> or UPF1<sub>LL</sub>-specific depletion under normal cellular conditions, page 9.**

**Appendix Table S2. qPCR primers, page 10.**

**A**

|            |                                                   |
|------------|---------------------------------------------------|
| Human      | LPKTDSGNE <del>DLVI</del> IWL <del>RD</del> MRLM  |
| Chimpanzee | LPKTDSGNE <del>DLVI</del> IWL <del>RD</del> MRLM  |
| Mouse      | LPKTDSGNE <del>DLVI</del> IWL <del>RD</del> MRLM  |
| Guinea pig | LPKTDSGEE <del>EGV</del> VLVWL <del>RD</del> MRLM |
| Dog        | LPKTDSGNE <del>DLVI</del> IWL <del>RD</del> MRLM  |
| Megabat    | LPKTDSGNE <del>DLVI</del> IWL <del>RD</del> MRLM  |
| Tenrec     | LPKTDSGNE <del>DLVI</del> IWL <del>RD</del> MRLM  |
| Platypus   | LPKTDSGNE <del>DLVI</del> IWL <del>RD</del> MRLM  |
| Consensus  | LPKTDSGNE <del>DLVI</del> IWL <del>RD</del> MRLM  |

**B**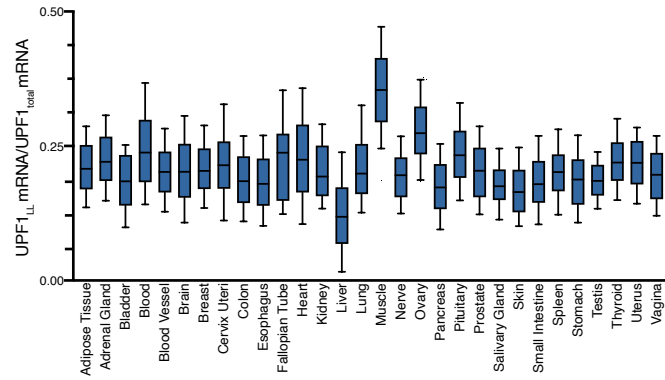**C**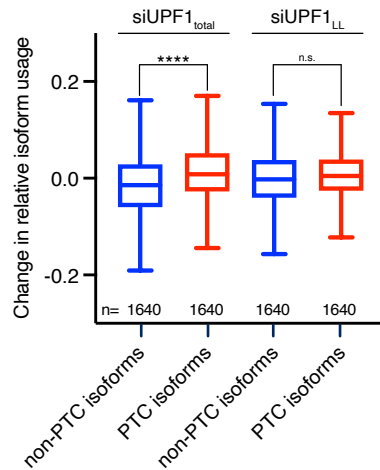

### Appendix Figure S1. Conserved UPF1<sub>LL</sub> does not systematically regulate EJC-enhanced NMD.

**A.** UPF1<sub>LL</sub> regulatory loop sequence alignment across mammals. Indicated UPF1<sub>LL</sub> regulatory loop amino acid sequences were retrieved from the UCSC Genome Browser and aligned using T-Coffee. Conserved residues are shaded grey.

**B.** Box plot of the fraction of UPF1<sub>LL</sub>/UPF1<sub>total</sub> mRNA expressed in indicated human tissues, as determined from the Genotype-Tissue Expression (GTEx) project. Boxes indicate interquartile ranges, and bars indicate 10-90% ranges.

**C.** Box plot of the change in relative isoform usage of PTC-containing transcripts as determined from RNA-seq following total UPF1 (siUPF1<sub>total</sub>) or UPF1<sub>LL</sub>-specific knockdown in HEK-293 cells. Genes for which expression of an isoform containing a termination codon greater than 50 nt upstream of the final exon junction were analyzed, with mRNA isoforms classified as having or lacking a premature termination codon (PTC). Statistical significance was determined by one-way ANOVA (\*\*\*\*  $P < 1 \times 10^{-15}$ ). Boxes indicate interquartile ranges, horizontal line indicates the statistical median, and bars indicate Tukey whiskers.

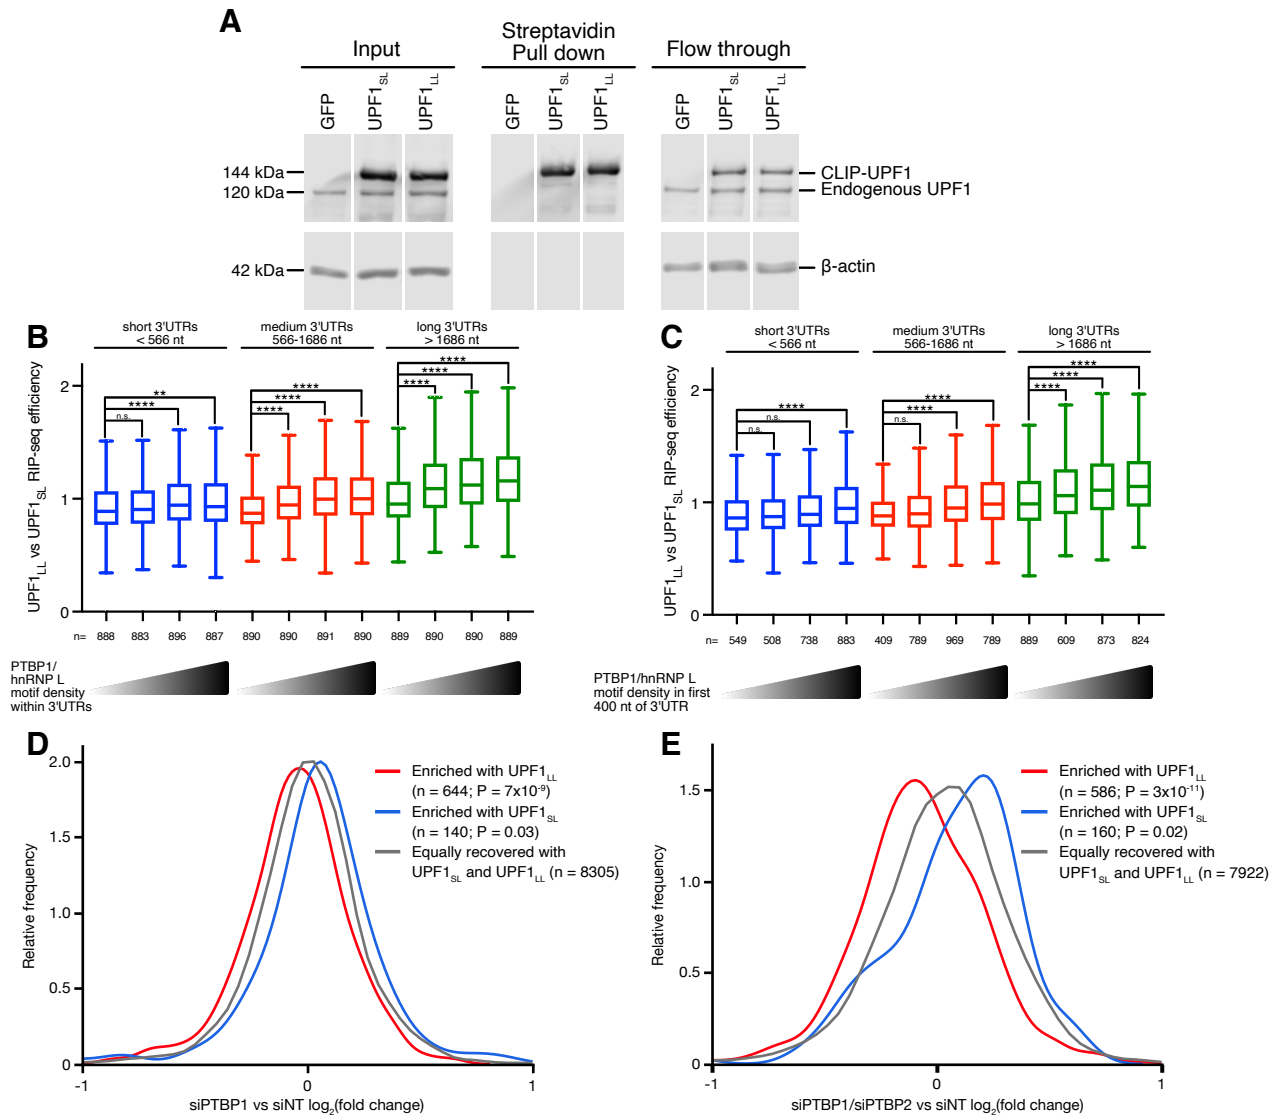

## Appendix Figure S2. UPF1<sub>LL</sub> can bind transcripts normally shielded by protective proteins.

**A.** Western blots of CLIP-UPF1<sub>SL</sub> and CLIP-UPF1<sub>LL</sub> cell lysates before (input) and after (pull down) biotin-streptavidin affinity purification. Input and flow through lanes represent 5% of total material.

**B.** Box plot of recovered mRNAs as determined from RIP-seq efficiency in CLIP-UPF1<sub>LL</sub> vs CLIP-UPF1<sub>SL</sub> affinity purifications. mRNAs were binned according to 3'UTR length (short, medium, long) and then equally subdivided by PTBP1 and/or hnRNP L motif density within the 3'UTR, as indicated by the gradient triangles. Statistical significance was determined by K-W test, with Dunn's correction for multiple comparisons (\*\*  $P < 0.002$ , \*\*\*\*  $P < 5 \times 10^{-6}$ ). Boxes indicate interquartile ranges, horizontal line indicates the statistical median, and bars indicate Tukey whiskers.

**C.** Box plot as in (B), except that 3'UTR length bins were subdivided by PTBP1 and/or hnRNP L motif density with in the first 400 nt of the 3'UTR. Statistical significance was determined by K-W test, with Dunn's correction for multiple comparisons (\*\*\*\*  $P < 6 \times 10^{-5}$ ). Boxes indicate interquartile ranges, horizontal line indicates the statistical median, and bars indicate Tukey whiskers.

**D.** Density plot of changes in relative mRNA abundance as determined by RNA-seq following PTBP1 knockdown in HEK-293 cells (Data ref: Ge *et al*, 2016). mRNAs were binned by RIP-seq efficiency in CLIP-UPF1<sub>LL</sub> or CLIP-UPF1<sub>SL</sub> affinity purifications. Statistical significance was determined by K-W test, with Dunn's correction for multiple comparisons.

**E.** Density plot as in (D), following PTBP1 and PTBP2 knockdown in mouse neuronal progenitor cells (Data ref: Linares *et al*, 2015).

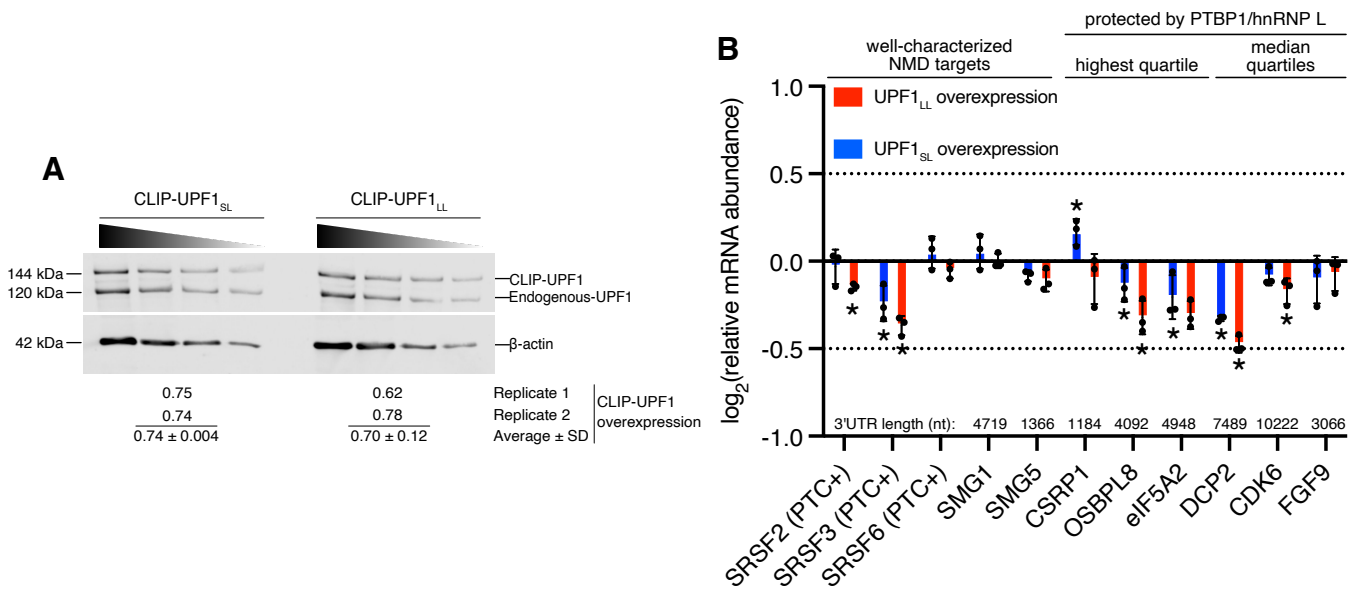

**Appendix Figure S3. UPF1<sub>LL</sub> overexpression down-regulates NMD-protected mRNAs in a dose-dependent manner.**

**A.** Western blots of reduced CLIP-UPF1<sub>SL</sub> and CLIP-UPF1<sub>LL</sub> overexpression. Membranes were probed with an anti-UPF1 antibody that detects both endogenous and CLIP-tagged UPF1. Wedge indicates serial two-fold dilutions of lysate. Mean ( $\pm$  standard deviation) of CLIP-UPF1 overexpression was determined from two replicate membranes.

**B.** RT-qPCR analysis of indicated transcripts from reduced CLIP-UPF1 overexpression experiments. Relative fold changes are in reference to a parental control line. Significance of CLIP-UPF1<sub>SL</sub> or CLIP-UPF1<sub>LL</sub> overexpression was compared to the parental control line. Asterisk (\*) indicates  $P < 0.05$ , as determined by two-way ANOVA. Black dots represent individual data points and error bars indicate mean $\pm$ SD ( $n = 3$  biological replicates). Dashed lines indicate  $\log_2$ (fold change) of  $\pm 0.5$ . For protected mRNAs, the motif density of PTBP1/hnRNP L within the 3'UTR is indicated. PTC+ indicates the use of primers specific to transcript isoforms with validated poison exons (Lareau et al., 2007; Ni et al., 2007). See also Dataset EV3 for  $P$  values associated with each statistical comparison.

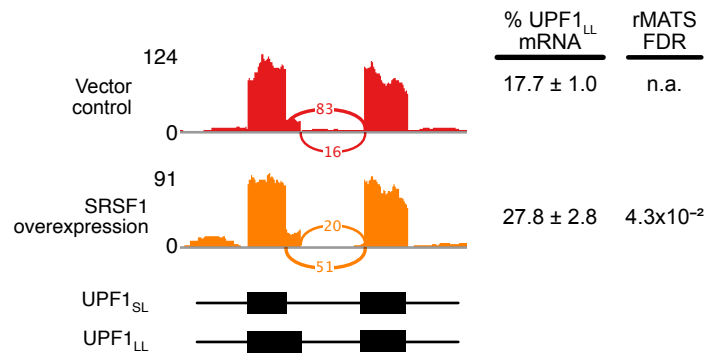

**Appendix Figure S4. UPF1<sub>LL</sub> expression is regulated by SRSF1.**

Sashimi plot from representative RNA-seq samples of SRSF1 overexpression (Data ref: Caputi *et al*, 2019). Percent spliced in values and FDR were calculated with rMATS software (n = 3 biological replicates).

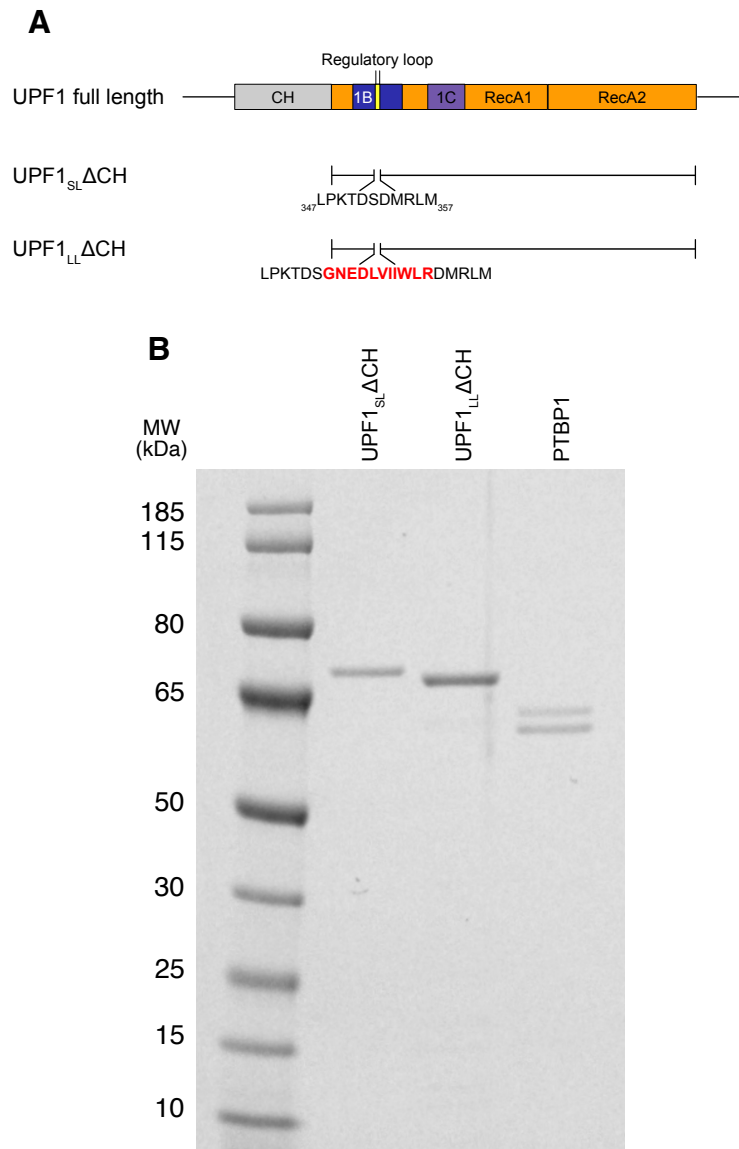

**Appendix Figure S5. Reduced sensitivity of UPF1<sub>LL</sub> to translocation inhibition by PTBP1.**

**A.** Schematic representation of the domain organization of full-length human UPF1, with the UPF1 $\Delta$ CH constructs assessed in this study depicted below. The 11 amino acid extension in the regulatory loop of UPF1<sub>LL</sub> is indicated in red text.

**B.** SDS-PAGE of recombinant 6xHIS-CBP-UPF1<sub>SL</sub> $\Delta$ CH (MW: 76 kDa), 6xHIS-UPF1<sub>LL</sub> $\Delta$ CH (MW: 73 kDa), and 6xHIS-PTBP1 (MW: 62 kDa) proteins purified from *E. coli* and used in this study. PTBP1 doublet consists of differentially migrating conformers of identical MW, as determined by mass spectrometry of bands excised from SDS-PAGE gels (Fritz et al., 2020).

**A**

|                                                     | 606 genes down 1.4x (FDR < 0.05) in thapsigargin |                           |           |
|-----------------------------------------------------|--------------------------------------------------|---------------------------|-----------|
|                                                     | Up 1.4x<br>(FDR < 0.05)                          | Down 1.4x<br>(FDR < 0.05) | Unchanged |
| siUPF1 <sub>LL</sub> vs. siNT<br>in 6h thapsigargin | 135                                              | 70                        | 401       |
| siUPF1 <sub>LL</sub> vs. siNT<br>in 9h thapsigargin | 143                                              | 62                        | 401       |

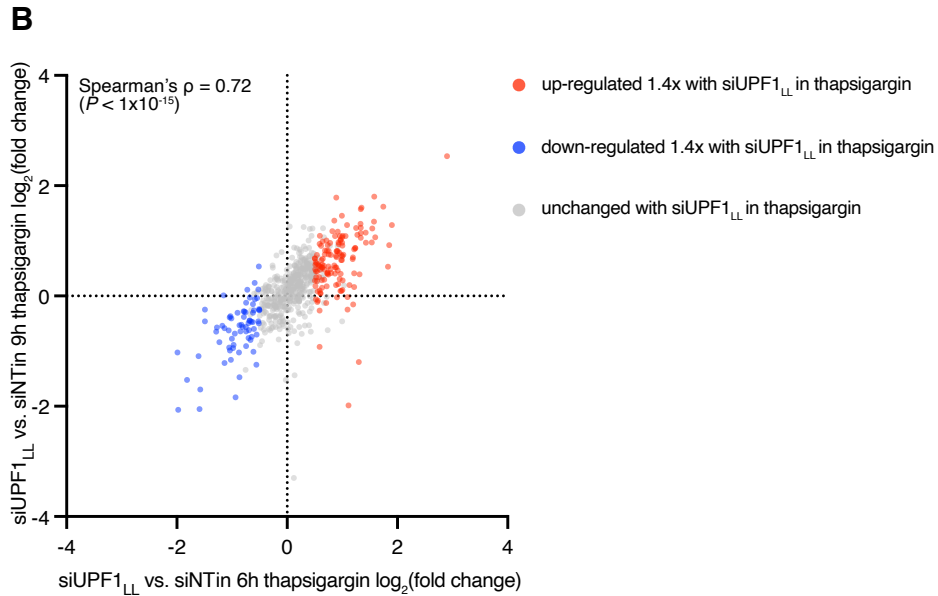

**Appendix Figure S6. mRNAs selectively down-regulated during ER stress and induction of the ISR are systematically dependent upon UPF1<sub>LL</sub> for their regulation.**

**A.** RNA-seq analysis of HEK-293 cells treated with 1  $\mu$ M thapsigargin identified a population of 606 genes that decreased in abundance, of which a 135 (6h) or 143 (9h) were rescued by UPF1<sub>LL</sub>-specific knockdown. Indicated are the number of genes from this population of 606 that increased or decreased in abundance at least 1.4-fold (FDR < 0.05) with UPF1<sub>LL</sub>-specific knockdown following 6 or 9hr treatment in thapsigargin. At least 2-fold more genes were selectively up-regulated with siUPF1<sub>LL</sub> compared to those that were down-regulated with UPF1<sub>LL</sub>-specific depletion in thapsigargin.

**B.** Scatterplot of changes in abundance of the 606 mRNAs that decreased in abundance upon 1  $\mu$ M thapsigargin treatment (6h) as determined by RNA-seq following knockdown of UPF1<sub>LL</sub> in HEK-293 cells and treatment with 1  $\mu$ M thapsigargin, comparing 6hr vs 9hr of drug treatment. Genes are categorized as being up or down-regulated 1.4-fold (FDR < 0.05) in response to UPF1<sub>LL</sub> knockdown in thapsigargin treatment. Dashed lines indicate the center-point of zero on both axes.

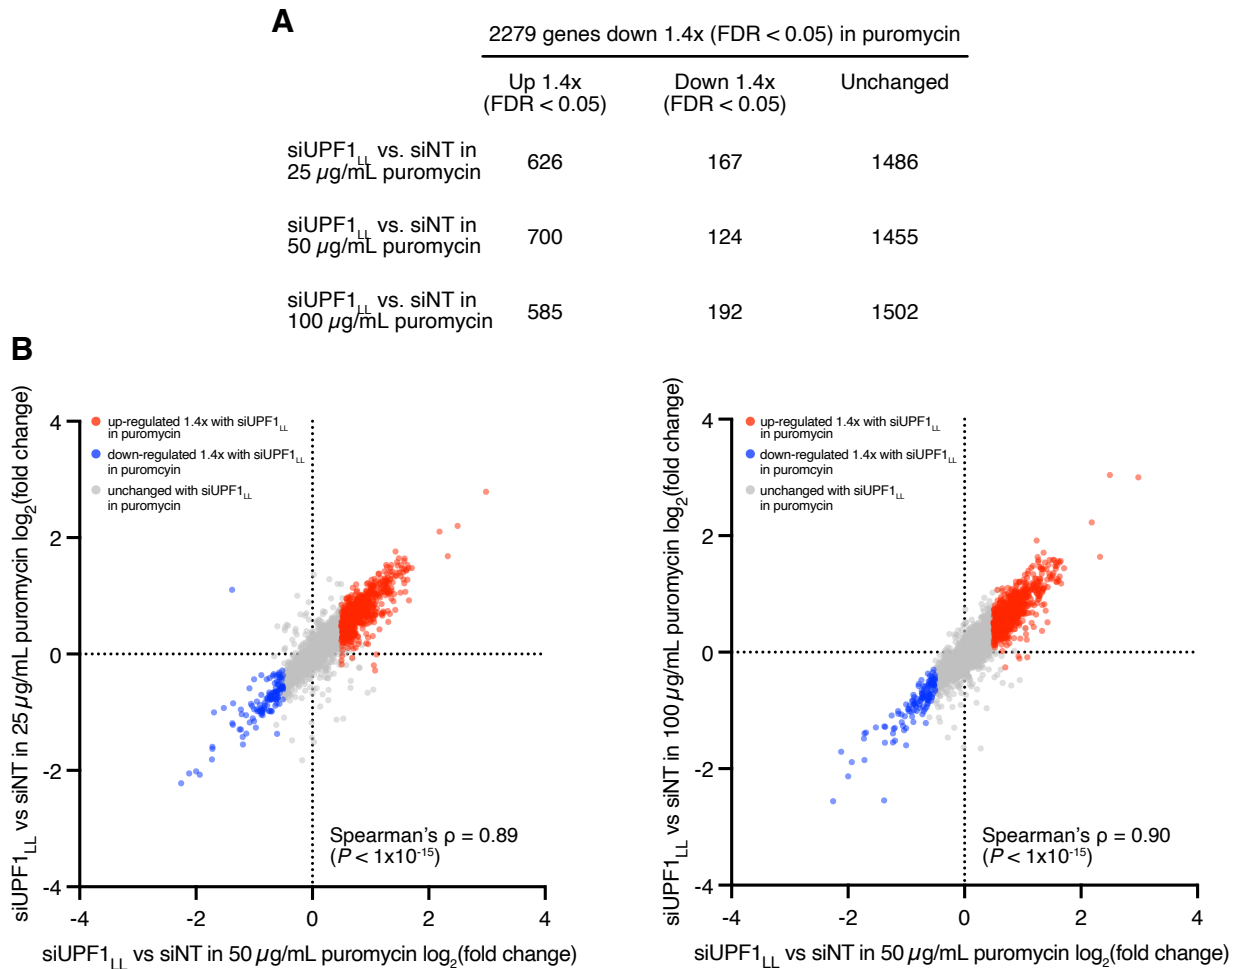

**Appendix Figure S7. Downregulation of select genes during partial translational repression is dependent upon UPF1<sub>LL</sub> activity.**

**A.** RNA-seq analysis of HEK-293 cells treated with 50  $\mu$ g/mL puromycin identified a population of 2279 genes that decreased in abundance, of which 700 were rescued by UPF1<sub>LL</sub>-specific knockdown. Indicated are the number of genes from this population of 2279 that increased or decreased in abundance at least 1.4-fold (FDR < 0.05) with UPF1<sub>LL</sub>-specific knockdown following treatment with 25, 50, or 100  $\mu$ g/mL puromycin. At least 3-fold more genes were selectively up-regulated with siUPF1<sub>LL</sub> compared to those that were down-regulated with UPF1<sub>LL</sub>-specific depletion in puromycin.

**B.** Scatterplot of changes in relative abundance of the 2279 mRNAs decreased in abundance upon treatment with 50  $\mu$ g/mL puromycin, as determined by RNA-seq following knockdown of UPF1<sub>LL</sub> in HEK-293 cells and treatment with puromycin, comparing 50  $\mu$ g/mL vs 25  $\mu$ g/mL of drug treatment (left) or 50  $\mu$ g/mL vs 100  $\mu$ g/mL of drug treatment (right). Genes are categorized as being up or down-regulated 1.4-fold (FDR < 0.05) in response to UPF1<sub>LL</sub> knockdown in puromycin treatment. Dashed lines indicate the center-point of zero on both axes.



**Appendix Table S1. NMD-inducing features of genes common and unique to UPF1<sub>total</sub> or UPF1<sub>LL</sub>-specific depletion under normal cellular conditions.**

|                                         |                        | Response to UPF1 <sub>total</sub> or UPF1 <sub>LL</sub> -specific knockdown in HEK-293 cells under normal cellular conditions |                                          |                                                            |             |
|-----------------------------------------|------------------------|-------------------------------------------------------------------------------------------------------------------------------|------------------------------------------|------------------------------------------------------------|-------------|
| NMD-inducing feature                    |                        | Up >1.4x in siUPF1 <sub>LL</sub> only                                                                                         | Up >1.4x in siUPF1 <sub>total</sub> only | Up >1.4x in siUPF1 <sub>total</sub> & siUPF1 <sub>LL</sub> | Other       |
| Gene does not have PTC                  | Count                  | 892                                                                                                                           | 1000                                     | 379                                                        | 8747        |
|                                         | Column %               | 86.85491724                                                                                                                   | 74.57121551                              | 74.0234375                                                 | 84.4957496  |
|                                         | Chi-Square statistic   | 1.58699552                                                                                                                    | 12.18014599                              | 5.254724602                                                | 1.87448916  |
|                                         | Chi-Square probability | $P > 0.10$                                                                                                                    | $P > 0.005$                              | $P > 0.10$                                                 | $P > 0.10$  |
| Gene has PTC                            | Count                  | 135                                                                                                                           | 341                                      | 133                                                        | 1605        |
|                                         | Column %               | 13.14508277                                                                                                                   | 25.42878449                              | 25.9765625                                                 | 15.5042504  |
|                                         | Chi-Square statistic   | 7.897703992                                                                                                                   | 60.61465607                              | 26.15020581                                                | 9.32841988  |
|                                         | Chi-Square probability | $P > 0.10$                                                                                                                    | $P < 0.005$                              | $P < 0.005$                                                | $P > 0.025$ |
| Gene does not have uORF                 | Count                  | 392                                                                                                                           | 408                                      | 157                                                        | 4099        |
|                                         | Column %               | 38.16942551                                                                                                                   | 30.42505593                              | 30.6640625                                                 | 39.5962133  |
|                                         | Chi-Square statistic   | 0.000451227                                                                                                                   | 21.27172543                              | 7.630635798                                                | 5.20298701  |
|                                         | Chi-Square probability | $P > 0.995$                                                                                                                   | $P < 0.005$                              | $P > 0.05$                                                 | $P > 0.10$  |
| Gene has uORF                           | Count                  | 635                                                                                                                           | 933                                      | 355                                                        | 6253        |
|                                         | Column %               | 61.83057449                                                                                                                   | 69.57494407                              | 69.3359375                                                 | 60.4037867  |
|                                         | Chi-Square statistic   | 0.000279037                                                                                                                   | 13.1543351                               | 4.718749339                                                | 3.21750273  |
|                                         | Chi-Square probability | $P > 0.995$                                                                                                                   | $P < 0.005$                              | $P > 0.10$                                                 | $P > 0.10$  |
| Gene does not have long 3'UTR           | Count                  | 719                                                                                                                           | 982                                      | 371                                                        | 7274        |
|                                         | Column %               | 70.0097371                                                                                                                    | 73.22893363                              | 72.4609375                                                 | 70.2666151  |
|                                         | Chi-Square statistic   | 0.056265363                                                                                                                   | 1.280608911                              | 0.242527829                                                | 0.19545803  |
|                                         | Chi-Square probability | $P > 0.99$                                                                                                                    | $P > 0.10$                               | $P > 0.95$                                                 | $P > 0.975$ |
| Gene has long 3'UTR (> 1686 nt)         | Count                  | 308                                                                                                                           | 359                                      | 141                                                        | 3078        |
|                                         | Column %               | 29.9902629                                                                                                                    | 26.77106637                              | 27.5390625                                                 | 29.7333849  |
|                                         | Chi-Square statistic   | 0.13532066                                                                                                                    | 3.079920454                              | 0.583290039                                                | 0.47008511  |
|                                         | Chi-Square probability | $P > 0.975$                                                                                                                   | $P > 0.10$                               | $P > 0.90$                                                 | $P > 0.90$  |
| Gene does not have NMD-inducing feature | Count                  | 266                                                                                                                           | 256                                      | 93                                                         | 2748        |
|                                         | Column %               | 25.9006816                                                                                                                    | 19.09023117                              | 18.1640625                                                 | 26.5455951  |
|                                         | Chi-Square statistic   | 0.095058947                                                                                                                   | 21.11092262                              | 10.59341163                                                | 5.20032654  |
|                                         | Chi-Square probability | $P > 0.995$                                                                                                                   | $P < 0.025$                              | $P > 0.10$                                                 | $P > 0.10$  |
| Gene has one NMD-inducing feature       | Count                  | 471                                                                                                                           | 609                                      | 233                                                        | 4624        |
|                                         | Column %               | 45.8617332                                                                                                                    | 45.41387025                              | 45.5078125                                                 | 44.6676971  |
|                                         | Chi-Square statistic   | 0.225803577                                                                                                                   | 0.088893323                              | 0.04663951                                                 | 0.09303052  |
|                                         | Chi-Square probability | $P > 0.995$                                                                                                                   | $P > 0.995$                              | $P > 0.995$                                                | $P > 0.995$ |
| Gene has two NMD-inducing features      | Count                  | 263                                                                                                                           | 404                                      | 162                                                        | 2628        |
|                                         | Column %               | 25.60856865                                                                                                                   | 30.12677107                              | 31.640625                                                  | 25.3863988  |
|                                         | Chi-Square statistic   | 0.10526875                                                                                                                    | 8.215418485                              | 5.959624576                                                | 2.16777296  |
|                                         | Chi-Square probability | $P > 0.995$                                                                                                                   | $P > 0.10$                               | $P > 0.10$                                                 | $P > 0.975$ |
| Gene has three NMD-inducing features    | Count                  | 27                                                                                                                            | 72                                       | 24                                                         | 352         |
|                                         | Column %               | 2.629016553                                                                                                                   | 5.369127517                              | 4.6875                                                     | 3.40030912  |
|                                         | Chi-Square statistic   | 2.640811425                                                                                                                   | 11.82717624                              | 1.718632979                                                | 1.03526576  |
|                                         | Chi-Square probability | $P > 0.975$                                                                                                                   | $P > 0.10$                               | $P > 0.995$                                                | $P > 0.995$ |

**Appendix Table S2. qPCR primers**

| <b>Gene</b>           | <b>Forward Primer (5' to 3')</b> | <b>Reverse Primer (5' to 3')</b> |
|-----------------------|----------------------------------|----------------------------------|
| AIFM2                 | CCTTGAGGGGACTTTGTGGTT            | CATAGTCGGTGGCAGACATTAG           |
| ARID3A                | ACAGAAAGAGGCAGACGTTTC            | ACACAGTGCAGGGATGTATG             |
| ATF4                  | TCAAACCTCATGGGTTCTCC             | GTGTCATCCAACGTGGTCAG             |
| CDK16                 | CATGTTACCTGCCACTT                | GACCAAGTGAAGGAGTGATGAG           |
| CDK6                  | CAGTTCTTCCATCGGTGTAGTT           | GCTTGTGTTGGATCTGGATTTC           |
| COL4A1                | CCTGCTTCATTGACCTCTACTT           | TGGAGTTCTCACTTCACACATC           |
| CSPG4                 | AACCAGGGTAACCTCCTACA             | TCCTTCTCCTTGCCCTCTTA             |
| CSRP1                 | ACTTGAACCTGGGCATCTGG             | ACCTAGACCCAAAACACTGAGG           |
| CUL2                  | AGACTAGTACCCTAGCTCTGTG           | CTGTTGGAGGAGGGTTGTAAG            |
| DCP2                  | CTCCTCAAGCCTTACCTTTCTC           | GTGCAAACCTCGTGTTCCTTTCT          |
| DICER1                | CAGTCTTGCACTCCCATCAA             | CACCTCTGCTCAGCTTTCTT             |
| EFNB3                 | ATGACAGCTACCATGAGAAGAAG          | GCATCAGACCAAGTCCATACA            |
| eIF5A2                | GTGAGGTCAAGTGCCTGAAA             | AGGTGAAAGCCTGGTATGC              |
| ERBB2                 | GGAGTCTTTGTGGATTCTGAGG           | CTTCCCTAAGGCTTTTCAGTACC          |
| FAM171B               | CTGCTGTCTCGTGCTGTTTA             | GAGACATGTCCAAGAACCATGA           |
| FGF9                  | CACGCGGTGGGTTCTTATT              | CCATCCAAGCCTCCATCATAC            |
| FMR1                  | CTTAGCACTTCAGGGCAGATT            | TGATCACCCAATGCAGGAAA             |
| GAPDH                 | AACATCATCCCTGCCTCTACTGG          | GTTTTTCTAGACGGCAGGTCAGG          |
| GCNT1                 | TCGAGATGATGAGGGTGGTA             | GCTAAGAGAAGCATGGGAGAA            |
| GIGYF2                | GCACTGGCTGGTTCTGTATT             | CAGGAGCTGATCCACATGTTAG           |
| GJB2                  | CCTGTTTCAGAGGCTCAGATT            | CAGCTGTGCTGCAAAGTATTC            |
| GPR161                | CTCTGGATGGACCACAAGATAC           | CTCACTGCCTCCTCTTTATAGC           |
| HDAC1                 | GGTCTTCAAGGATCTCCTGTTT           | CAGTGTTCCTTGGCTCACTTG            |
| HERC3                 | GCTGAGTCTGGTCCATTATT             | GCCATGGGAAAGTTGCTATTC            |
| LDLR                  | GCCTCTGAAATGCCTCTTCT             | CCCAGAAGCCACTCATACTAC            |
| MAP1A                 | GCTGTGGCTTGGTGTAAATG             | CAGGATGGCATAGTGAATGT             |
| MED17                 | AAGGACAGCTGAAGGCAATAG            | GTCTCAACTGGTGAGGTCAATC           |
| METTL7A               | CCGAGATCATGCCATTGTACT            | CTGTCTCCCTGTCTCTACTTCT           |
| NFKB1                 | TCCCTCTGCTACGTTCTTATT            | ATGGCACATCAAGTGACTCTC            |
| NXT2                  | CACTGTGAACCCAGCCTATT             | CCACTTCTTCCCAGAGTGTTAT           |
| OSBPL8                | TGCCAGGACATTTCTAGCTTT            | GACTACTGTCAGGTAGGAGTACA          |
| PTEN                  | TGTAATCAAGGCCAGTGCTAAA           | AGCATCCACAGCAGGTATTATG           |
| RICTOR                | TATGCAGAAGCACCTTCAC              | CAGCCTTAGAGACACTGATTCC           |
| SMG1                  | AAATGACCCTGCAGCGATAC             | GCTTCCTGTTTCAAGCGTTC             |
| SMG5                  | GCCTGGATTTGCTGAAGAAG             | TCAAAGCTCTTCCCACCTC              |
| SMG6                  | AGGCTTCCTTACCAAGAATGAG           | CCCCTGGTCCCATTAAAGATT            |
| SMG7                  | CTGGGAATGAAGGCTCCATAAA           | CCTCTTGACAGCGAGAAACA             |
| SRPR                  | CATCTGCAAGGAAGGCCTAATC           | TGAGTCTGTAGGCAGAGTGAAG           |
| SRSF2 (PTC+)          | GGCGTGTATTGGAGCAGATGTA           | CTGCTACACAACCTGCGCCTTTT          |
| SRSF3 (PTC+)          | TGGAACGTGCGAATGGTGAAG            | GAGACATGATGGTGACTCTGC            |
| SRSF6 (PTC+)          | GGAAGCCGCATGACCAA                | GGCAAGGGTCCACACAATGTA            |
| STAT2                 | CTGGACAATCTCACACCTTAGC           | TGCAGGGCCTTTCCTTTATATC           |
| TBL1XR1               | CATCAAGAGAGGCAGTCATTCA           | TCCTACGTAAGTCACAGGGTAA           |
| TGOLN2                | ATACCGCACATCAGAGGAAAG            | CTCATCCACACAATCGCTAGAA           |
| TIMP2                 | CTGCATCGTGGAAGCATTG              | AAGACGGGAGACGAATGAAAG            |
| TMEM165               | CCTGAGCCAGTAAACAGTAGTT           | CAGTTCTTGTGTTGTCATGTTAT          |
| TMEM19                | CTCAGCCTCCCAAAGATCTATTAC         | AGTGTGAAACCCAGACATCAG            |
| UPF1 <sup>total</sup> | GGACCTGGGAGATTTGAGAAG            | AAGAAGCCACTGGAAGCTAAA            |
| UPF1 <sup>LL</sup>    | GACTCTGGTAATGAGGATTTAGTCATA      | CGTGGCCGATCCCTTTC                |
| UPF2                  | CAAAAGCCAGCTGAGGAAAG             | GACAAACGGCATTGTGTCTG             |
| TNFRSF10D             | CATGGCATCAAGAGGGAAGA             | CAGTTCACAGACCACCAGAA             |
| VPS37D                | CATGTCCTGAGCCTACCTTTC            | GCATGTGTGGACACGTAGTAG            |
